# Supplementary material for: Tuning the local frictional and electrostatic responses of nanostructured SrTiO3—surfaces by self-assembled molecular monolayers
Source: Royal Society of Chemistry journal article supplement (doi:10.1039/b924227a), 2010-01-01
Supplement: b924227a.pdf [file b924227a.pdf]

## Supplementary Information for

# **Tuning the local frictional and electrostatic responses of nanostructured SrTiO<sub>3</sub> -surfaces by self-assembled molecular monolayers**

Markos Paradinas, Luis Garzón, Florencio Sánchez, Romain Bachelet, David B. Amabilino, Josep Fontcuberta and Carmen Ocal\*

\*To whom correspondence should be addressed. E-mail: [cocal@icmab.es](mailto:cocal@icmab.es)

**This pdf file includes:**

Figure SI

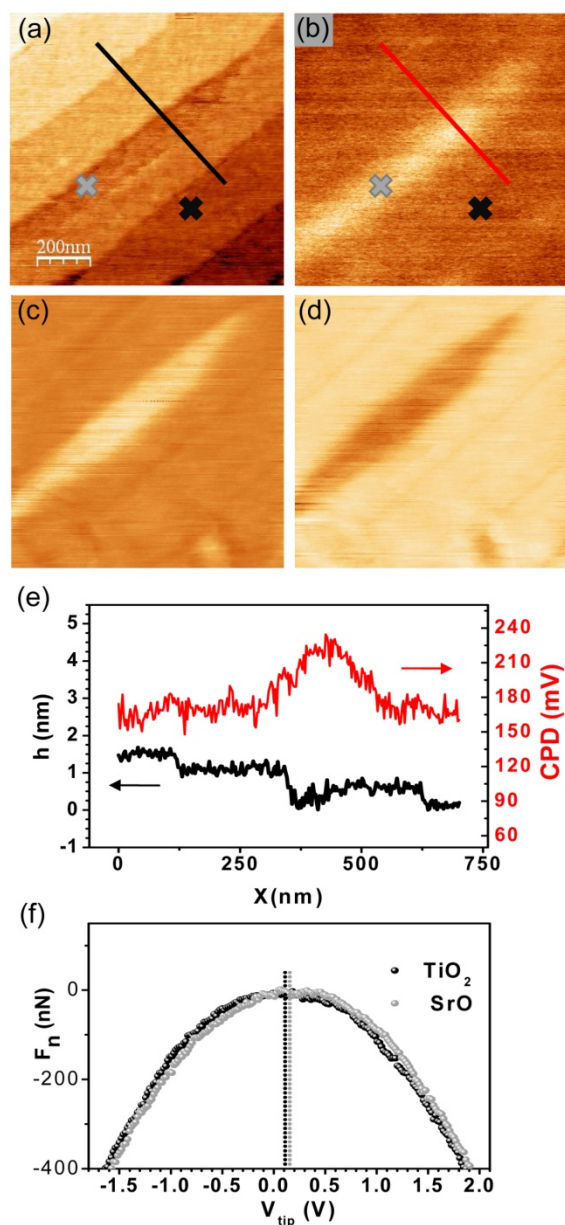

**Figure SI**

Topography (a), surface potential (CPD) (b), lateral force forward (c) and lateral force backward (d) images simultaneously acquired for a nanostructured  $\text{SrTiO}_3$  substrate as that of Fig. 1c in the manuscript. A line profile and the corresponding CPD signal are depicted in (e). Electrostatic force parabolas (f) obtained with the 3D approach on specific point locations (cross-marked points in the figure). The darker regions in all images correspond to the lower values of the corresponding magnitude.
